# Supplementary material for: Preparation of clay-supported Sn catalysts and application to Baeyer–Villiger oxidation
Source: Royal Society of Chemistry journal article supplement (doi:10.1039/c2gc16437j), 2012-01-01
Supplement: c2gc16437j.pdf [file c2gc16437j.pdf]

*Electronic Supplementary Information for:*

**Preparation of Clay-Supported Sn Catalysts and Application to Baeyer-Villiger Oxidation**

**Takayoshi Hara, Moriaki Hatakeyama, Arum Kim, Nobuyuki Ichikuni  
and Shogo Shimazu\***

*Department of Applied Chemistry and Biotechnology, Graduate School of Engineering,  
Chiba University / 1-33 Yayoi, Inage, Chiba 263-8522*

*E-Mail: shimazu@faculty.chiba-u.jp*

*Materials*

All the organic chemicals were commercial products purchased from Wako Pure Chemical Industry, Ltd. and Tokyo Chemical Industry, Ltd.. Tin(II or IV) compounds including  $(\text{CH}_3)_4\text{Sn}$  were also purchased from Wako and Aldrich, Ltd., and used for synthesis and analyses of catalysts without any further purification. Lithium Taeniolite was purchased from Topy Industry Ltd.

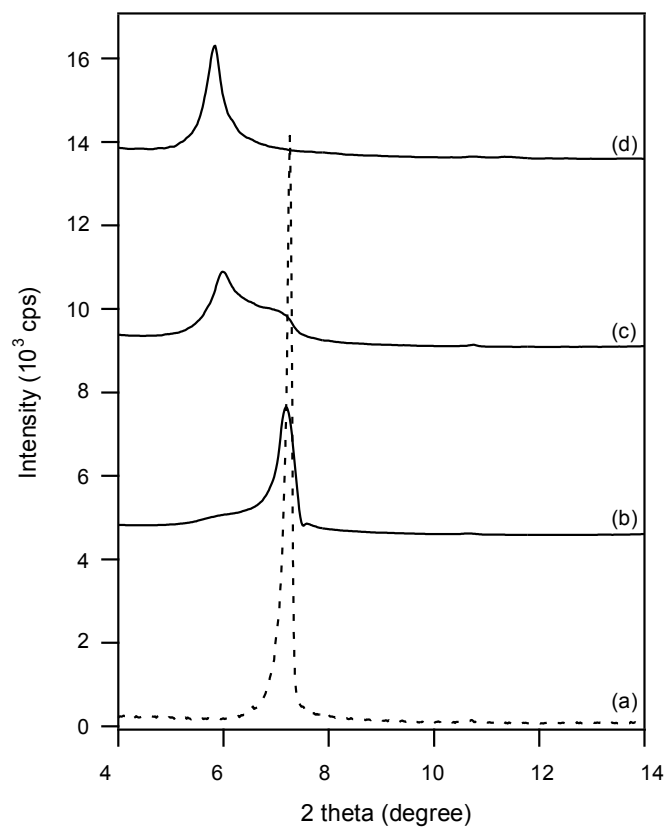

**Fig. S1** XRD profiles for (a) Li/TN, (b) Sn(0.19)/TN, (c) Sn(0.40)/TN, and (d) Sn(0.77)/TN.

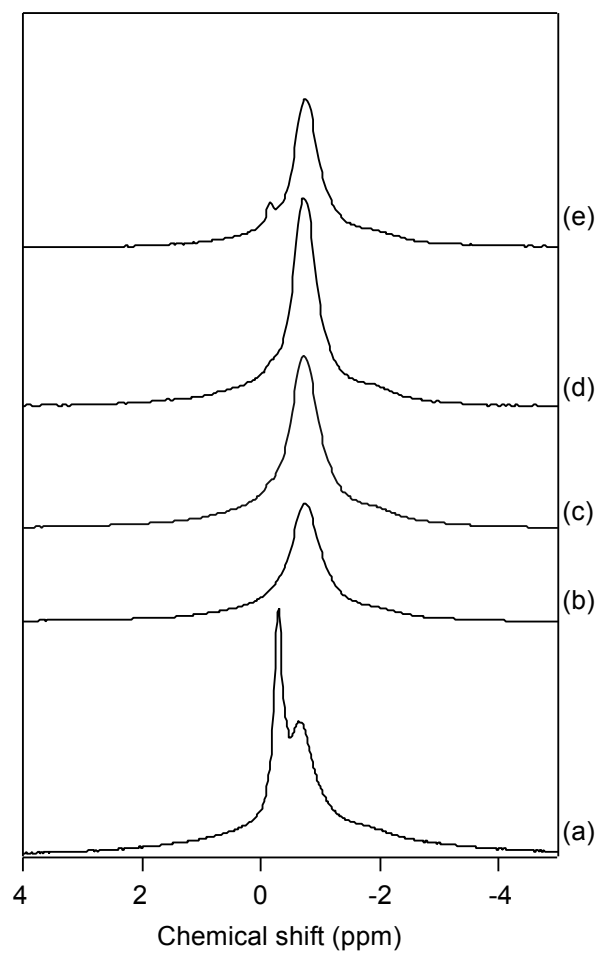

**Fig. S2**  $^7\text{Li}$  MAS NMR spectra for (a) Li/TN, (b) Na/TN, (c) K/TN, (d) Mg/TN, and (e) Ca/TN.

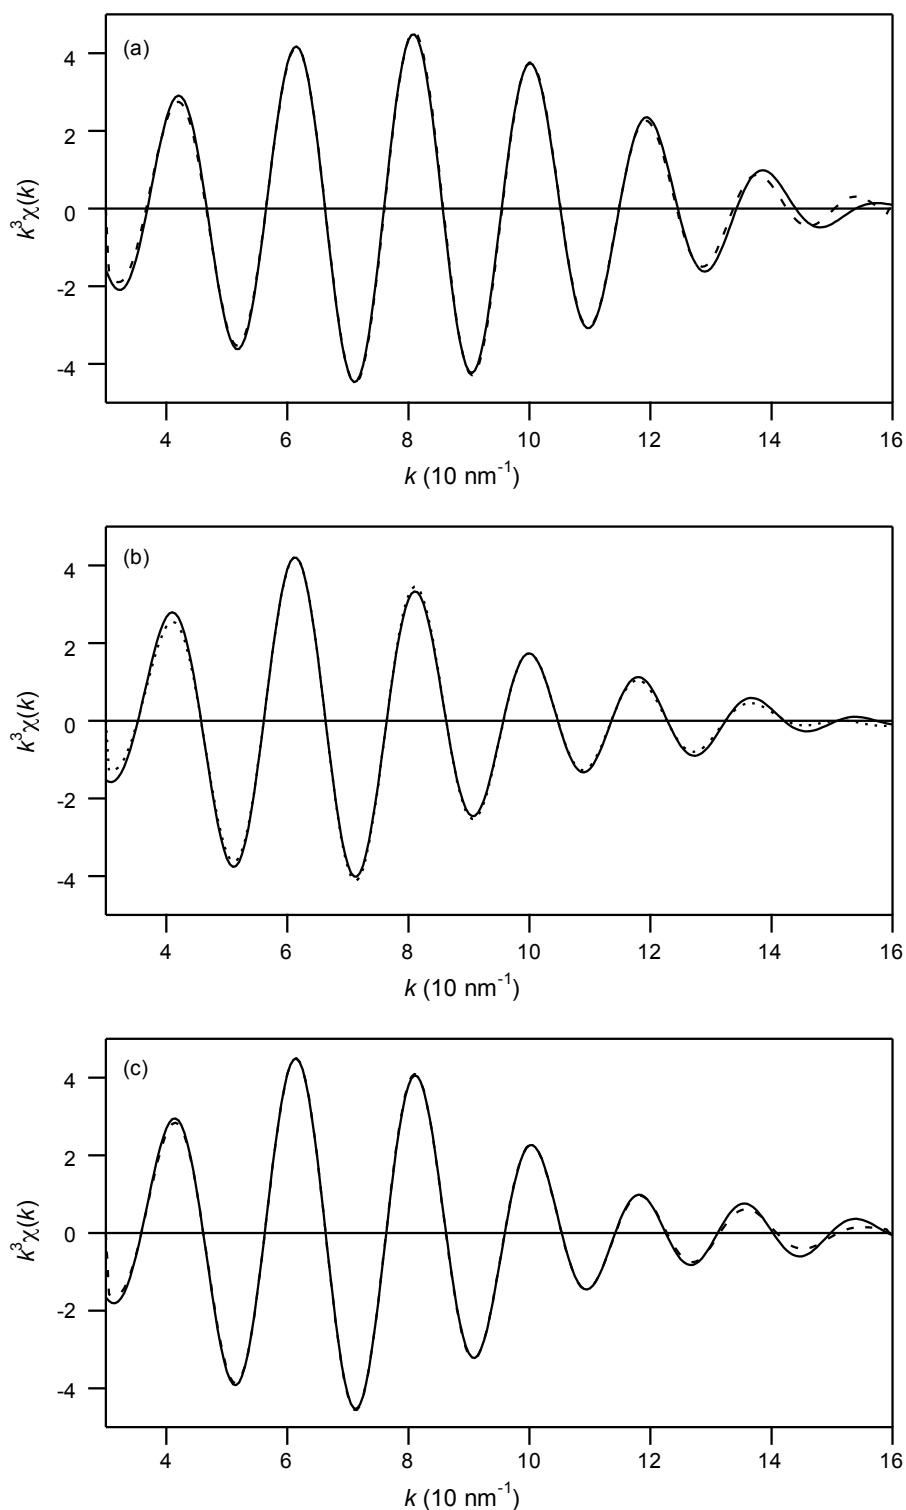

**Fig. S3** Curve-fitting of Fourier-filtered EXAFS of (a) Sn(0.77)/TN, (b) Sn(0.40)/TN, and (c) Sn(0.19)/TN catalyst. The solid curve is obtained experimentally, and the dashed curve is the calculated fit.

**Table S1** Solvent screening for Baeyer-Villiger oxidation with Sn(0.77)/TN catalyst<sup>a</sup>

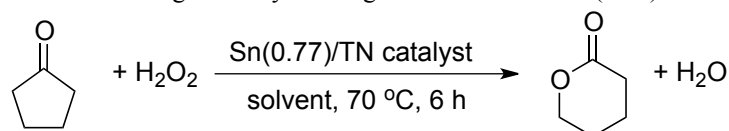

| Entry | Solvent                       | Conv. (%) <sup>b</sup> | Yield (%) <sup>b</sup> |
|-------|-------------------------------|------------------------|------------------------|
| 1     | 1,2-dichloroethane            | 75                     | 70                     |
| 2     | <i>n</i> -hexane              | 95                     | 36                     |
| 3     | toluene                       | 69                     | 35                     |
| 4     | ethyl acetate                 | 27                     | 22                     |
| 5     | acetonitrile                  | 7                      | 5                      |
| 6     | 1,4-dioxane                   | 4                      | 3                      |
| 7     | tetrahydrofuran               | 11                     | 2                      |
| 8     | <i>N,N</i> -dimethylformamide | 2                      | <i>n. d.</i>           |
| 9     | dimethylsulfoxide             | <i>n. d.</i>           | <i>n. d.</i>           |
| 10    | water                         | 5                      | 2                      |
| 11    | ethanol                       | 21                     | 6                      |
| 12    | methanol                      | 20                     | 5                      |
| 13    | neat                          | 97                     | 50                     |

<sup>a</sup> Cyclopentanone (0.5 mmol), Sn(0.77)/TN catalyst (0.05 g), solvent (1.5 mL), 30 wt% H<sub>2</sub>O<sub>2</sub> (2 eq. relative to ketone), 70 °C, 6 h

<sup>b</sup> Determined by GC using an internal standard technique.

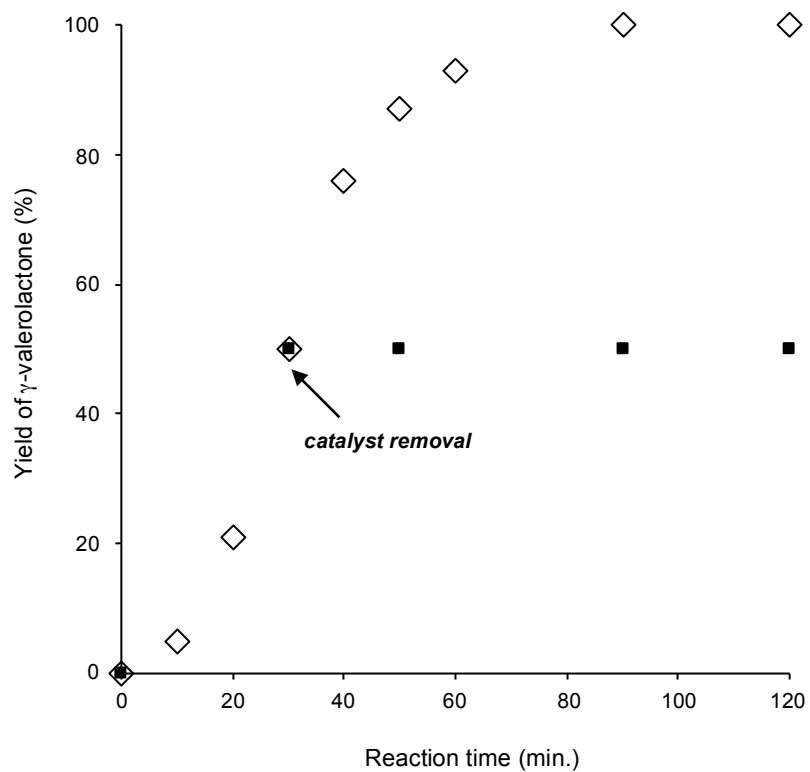

**Fig. S4** Effect of removal of the Sn(0.77)/TN catalyst on the Baeyer-Villiger oxidation of cyclopentanone: without removal of catalyst ( $\diamond$ ) and removal of catalyst ( $\blacksquare$ ).

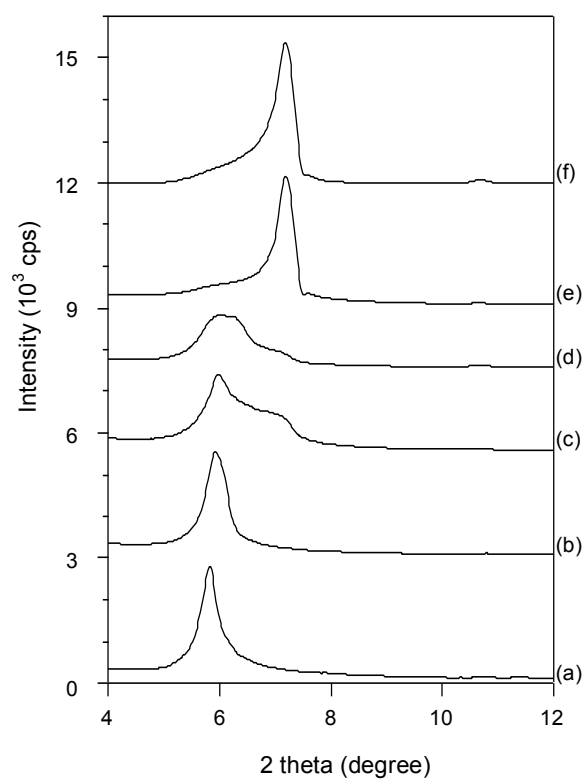

**Fig. S5** XRD profiles for (a) recovered Sn(0.77)/TN, (b) fresh Sn(0.77)/TN, (c) recovered Sn(0.40)/TN, (d) fresh Sn(0.40)/TN, (e) recovered Sn(0.19)/TN, and (f) fresh Sn(0.19)/TN catalysts.

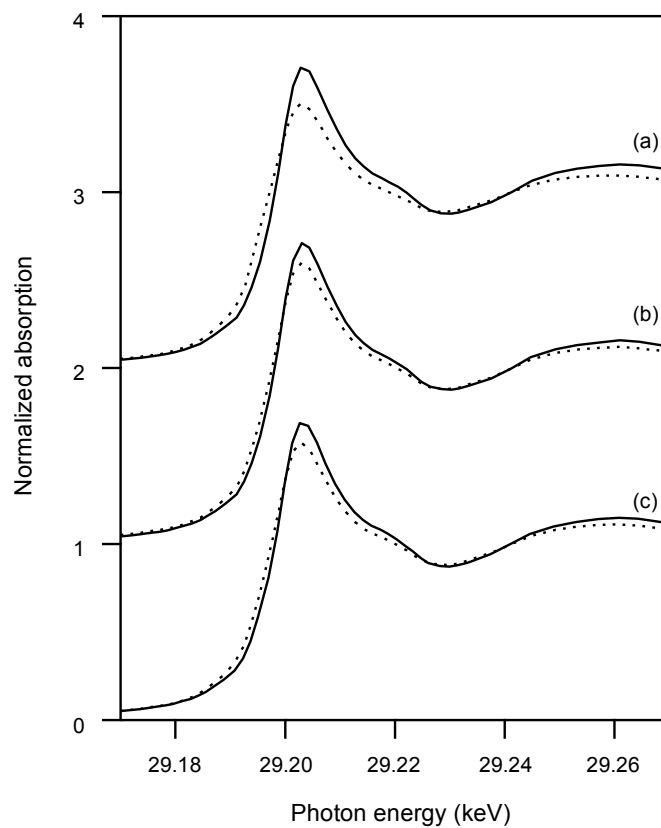

**Fig. S6** Sn *K*-edge XANES spectra for (a) Sn(0.77)/TN, (b) Sn(0.40)/TN, and (c) Sn(0.19)/TN catalyst. The solid curves are recovered catalysts, and the dashed curves are fresh catalyst.
